# Metnase Mediates Resistance to Topoisomerase II Inhibitors in Breast Cancer Cells

Justin Wray<sup>1</sup>, Elizabeth A. Williamson<sup>1</sup>, Melanie Royce<sup>1</sup>, Montaser Shaheen<sup>1</sup>, Brian D. Beck<sup>2</sup>, Suk-Hee Lee<sup>2</sup>, Jac A. Nickoloff<sup>3‡</sup>, Robert Hromas<sup>1\*</sup>

**1** Division of Hematology-Oncology, Cancer Research and Treatment Center, Department of Medicine, University of New Mexico Health Science Center, Albuquerque, New Mexico, United States of America, **2** Department of Biochemistry and Molecular Biology, Indiana University School of Medicine, Indianapolis, Indiana, United States of America, **3** Department of Molecular Genetics and Microbiology, University of New Mexico School of Medicine, Albuquerque, New Mexico, United States of America

## Abstract

DNA replication produces tangled, or catenated, chromatids, that must be decatenated prior to mitosis or catastrophic genomic damage will occur. Topoisomerase II $\alpha$  (Topo II $\alpha$ ) is the primary decatenating enzyme. Cells monitor catenation status and activate decatenation checkpoints when decatenation is incomplete, which occurs when Topo II $\alpha$  is inhibited by chemotherapy agents such as the anthracyclines and epirubicin. We recently demonstrated that the DNA repair component Metnase (also called SETMAR) enhances Topo II $\alpha$ -mediated decatenation, and hypothesized that Metnase could mediate resistance to Topo II $\alpha$  inhibitors. Here we show that Metnase interacts with Topo II $\alpha$  in breast cancer cells, and that reducing Metnase expression significantly increases metaphase decatenation checkpoint arrest. Repression of Metnase sensitizes breast cancer cells to Topo II $\alpha$  inhibitors, and directly blocks the inhibitory effect of the anthracycline adriamycin on Topo II $\alpha$ -mediated decatenation *in vitro*. Thus, Metnase may mediate resistance to Topo II $\alpha$  inhibitors, and could be a biomarker for clinical sensitivity to anthracyclines. Metnase could also become an important target for combination chemotherapy with current Topo II $\alpha$  inhibitors, specifically in anthracycline-resistant breast cancer.

**Citation:** Wray J, Williamson EA, Royce M, Shaheen M, Beck BD, et al. (2009) Metnase Mediates Resistance to Topoisomerase II Inhibitors in Breast Cancer Cells. PLoS ONE 4(4): e5323. doi:10.1371/journal.pone.0005323

**Editor:** Syed A. Aziz, Health Canada, Canada

**Received:** February 23, 2009; **Accepted:** March 23, 2009; **Published:** April 24, 2009

**Copyright:** © 2009 Wray et al. This is an open-access article distributed under the terms of the Creative Commons Attribution License, which permits unrestricted use, distribution, and reproduction in any medium, provided the original author and source are credited.

**Funding:** S.-H.L. was supported by NIH grant CA92111 and the U.S. Army (DAMD17-00-1-0295). B.D.B. was supported by an NIH pre-doctoral training grant (T32 DK0075-20), the Walther Cancer Institute, and the IU Simon Cancer Center. J.A.N. was supported by NIH grant CA100862, and R.H. was supported by NIH grant HL093606. Images were generated in the UNM Cancer Center Fluorescence Microscopy Facility which received support from NCR 1 S10 RR14668, NSF MCB9982161, NCR 2 P20 RR11830, NCI P30 CA118100, NCR 510 RR19287, NCR 510 RR016918, the UNM Health Sciences Center, and the UNM Cancer Center. Data was generated in the Flow Cytometry Shared Resource Center supported by the UNM Health Sciences Center and the UNM Cancer Center. The funders had no role in study design, data collection and analysis, decision to publish, or preparation of the manuscript.

**Competing Interests:** The authors have declared that no competing interests exist.

\* E-mail: rhromas@salud.unm.edu

‡ Current address: Department of Environmental and Radiological Health Sciences, Colorado State University, Ft. Collins, Colorado, United States of America

## Introduction

Topo II $\alpha$  inhibitors such as anthracyclines or epirubicin are important agents in the treatment of human malignancy [1–3]. These agents cause DNA damage by two mechanisms, locking Topo II $\alpha$  in a cleavage complex producing DNA double-strand breaks (DSBs), and inhibiting chromatid decatenation [3]. While the former mechanism is well understood, far less is known about the latter, yet it can be just as catastrophic to the cell. Failure of decatenation results in DSBs at anaphase, and to prevent this cells probably monitor decatenation at two positions in the cell cycle, at the G<sub>2</sub>/M boundary and at the metaphase to anaphase transition [4–10]. These decatenation checkpoints are activated independently of the G<sub>2</sub>/M DNA damage-dependent checkpoint [3,9,11,12]. Interestingly, lung and bladder cancers proceed through the decatenation checkpoints even in the presence of high levels of Topo II $\alpha$  inhibitors, and this was thought to be secondary to a failure of the cell cycle arrest machinery [13,14].

We recently isolated and characterized a human protein with SET and transposase domains called Metnase [15]. Metnase promotes non-homologous end joining DNA repair [15–18], enhances plasmid and viral DNA integration [18], and cleaves but

does not degrade supercoiled plasmid DNA [19]. We recently showed that Metnase interacts with Topo II $\alpha$  and enhances its function in chromosomal decatenation [19]. Therefore, we hypothesized that Metnase may mediate the resistance of malignant cells to Topo II $\alpha$  inhibitors, and chose to test this in breast cancer cells because anthracyclines are among the most important agents in the treatment of this disease [1,20–22]. We report here that Metnase interacts with Topo II $\alpha$  in breast cancer cells, promotes progression through metaphase in breast cancer cells treated with a Topo II $\alpha$  inhibitor, sensitizes breast cancer cells to the anthracycline adriamycin and the epirubicin VP-16, and directly blocks Topo II $\alpha$  inhibition by adriamycin *in vitro*. These data indicate that Metnase levels may be one reason why some breast cancer cells treated with Topo II $\alpha$  inhibitors can progress through mitosis without catastrophe resulting in drug resistance.

## Results and Discussion

Previously, we showed that Metnase expression directly correlates with Topo II $\alpha$  mediated decatenation in Human Embryonic Kidney cells. To determine if this finding would

further apply to neoplasia, we evaluated Metnase and Topo II $\alpha$  expression in four breast cell lines. MCF-10A is a cell line isolated from a benign hyperplastic breast lesion, T-47D from an infiltrating ductal carcinoma, HCC1937 from a primary ductal carcinoma, and MDA-MB-231 from a metastatic adenocarcinoma. As shown in Figure 1A, all of the cell lines express both Metnase and Topo II $\alpha$ , though the HCC1937 have significantly reduced Topo II $\alpha$  levels. Interestingly, MDA-MB-231 cells are the only cell line shown here derived from metastatic breast tissue. They have both an elevated Topo II $\alpha$  level and significant Metnase expression. Because of this, we chose these cells to determine if Metnase and Topo II $\alpha$  interact in breast cancer. In Figure 1B, we show that Metnase does co-immunoprecipitate (co-IP) with Topo II $\alpha$  and that Topo II $\alpha$  co-IPs with Metnase. Together, this provides evidence that Metnase could play a role in the pathogenesis and resistance of metastatic breast cancer to Topo II $\alpha$  inhibiting therapies.

Since Metnase enhances Topo II $\alpha$ -mediated decatenation, and enhances resistance to ICRF-193 and VP-16 in non-malignant human cells [19], we hypothesized that Metnase might also promote resistance to the anthracyclines and epididophyllotoxins in MDA-MB-231 cells. We first investigated whether reducing Metnase would affect ICRF-193-mediated metaphase arrest. MDA-MB-231 cells were treated with ICRF-193, which inhibits Topo II $\alpha$  after DNA religation, and therefore does not induce DSBs but does inhibit decatenation, allowing for discrimination between DNA damage and metaphase arrest [3]. The increase in cells arrested at metaphase in the presence of ICRF-193 compared to vehicle controls provides a measure of cells arrested due to failure of decatenation. Using  $\alpha$ -tubulin immunofluorescence microscopy, we determined the fraction of cells in metaphase after exposure to ICRF-193. Cells with reduced Metnase expression (Fig. 2A) showed a significantly higher percentage of metaphase arrested cells when treated with ICRF-193 and cytospun onto slides to retain all cells (Fig. 2C). After 18 hour treatments with 2 or 10  $\mu$ M ICRF-193, or 4 hours with 10  $\mu$ M ICRF-193, cells with reduced Metnase showed 4.9-fold (p-value = 0.0016), 2.2-fold (p-value = 0.027), and 2.6-fold (p-value = 0.00015) increased metaphase arrest, respectively, as compared to vector control and evaluated by student's t-test (Fig. 2B). This result suggests that Metnase promotes decatenation in ICRF-193-treated MDA-MB-231 cells, allowing them to proceed through metaphase even in the presence of this Topo II $\alpha$  specific inhibitor.

Prior studies revealed that bladder and lung cancer cells progress through the decatenation checkpoints when Topo II $\alpha$  is inhibited by high concentrations of ICRF-193 [13,14]. The conclusion from those studies was that these cancer cells failed to arrest because they had inactivated the decatenation checkpoints. While the ability to progress through mitosis even when Topo II $\alpha$

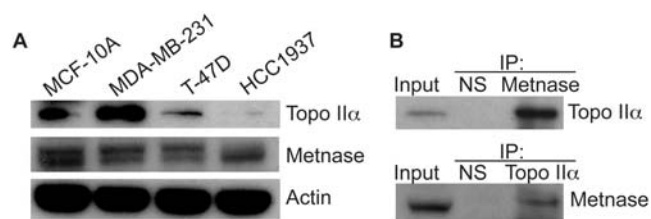

**Figure 1. Topo II $\alpha$  and Metnase interact in breast cancer cells.** (A) MCF 10A, MDA-MB-231, T-47D, and HCC1937 were analyzed by Western blot for expression of Topo II $\alpha$  and Metnase protein expression. Actin is shown as a loading control. (B) Metnase and Topo II $\alpha$  were immunoprecipitated from MDA-MB-231 cells and analyzed by Western blot. doi:10.1371/journal.pone.0005323.g001

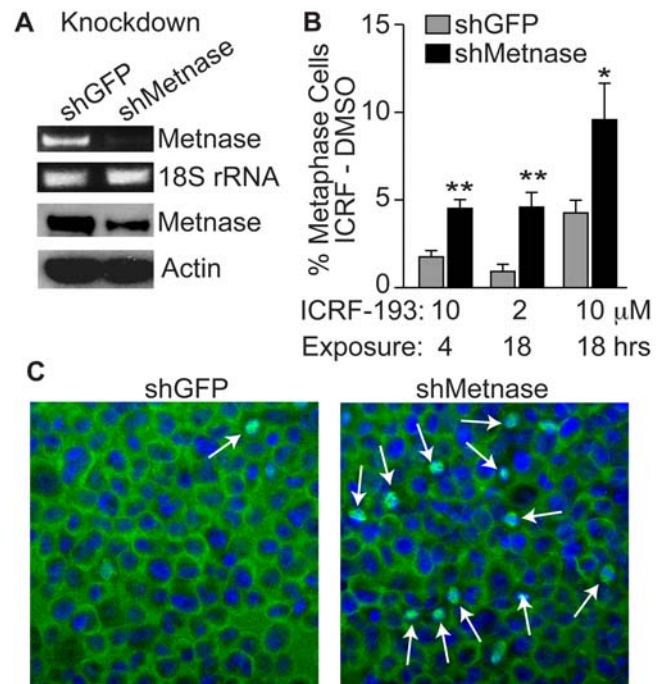

**Figure 2. Metnase shRNA expression induces metaphase arrest in MDA-MB-231 cells.** (A) Metnase expression was reduced by shRNA expression in MDA-MB-231 cells and analyzed by RT-PCR of mRNA and Western blot of protein, with 18S RNA and  $\beta$ -actin levels as loading controls. (B) Quantification of metaphase arrest after treatment with 2 or 10  $\mu$ M ICRF-193 for 18 hrs. The percentages of metaphase cells in DMSO control cultures were subtracted from ICRF-193 treated cultures. Values are averages (+SEM) for 10–15 determinations; single asterisk indicates P=0.022 and double asterisk indicates P=0.0002 (t tests). (C) Representative images of control (shGFP) and Metnase knockdown cells expressing control treated with ICRF-193 and stained with  $\alpha$ -tubulin (green) and DAPI; arrows indicate metaphase cells. doi:10.1371/journal.pone.0005323.g002

is inhibited may be a general feature of malignancy, it may be due to the presence of Metnase alone, or Metnase in combination with checkpoint inactivation. Thus, the decatenation checkpoint may be intact in these malignant cells, but Metnase promotes continued Topo II $\alpha$  function despite the presence of inhibitors, and the decatenation checkpoint is not activated.

The Topo II $\alpha$  inhibitor ICRF-193 does not induce significant DNA damage, and therefore is not relevant in the clinical therapy of breast cancer. To determine whether altering Metnase levels would affect resistance to clinically relevant Topo II $\alpha$  inhibitors, such as VP-16 and adriamycin [1,2], we determined the cytotoxicity of these agents in MDA-MB-231 cell lines that stably under-expressed Metnase using colony formation assays. Decreased Metnase expression increased sensitivity 7.5-fold to VP-16, and 3.5-fold to adriamycin (Fig. 3A and B). Together, these results indicate that Metnase expression levels directly correlate with cell survival after exposure to these clinically relevant Topo II $\alpha$  inhibitors. Adriamycin is an important agent in both adjuvant therapy and in the treatment of metastatic breast adenocarcinoma [1], so this finding is of relevance for current clinical regimens. It raises the possibility that treatment efficacy could be improved if the drug was used in combination with a future Metnase inhibitor, or if Metnase levels could be measured and possibly account for variance in responsiveness to adriamycin based chemotherapeutic regimens. Altogether, these results provide further support for the hypothesis that Metnase plays a key role in Topo II $\alpha$  function.

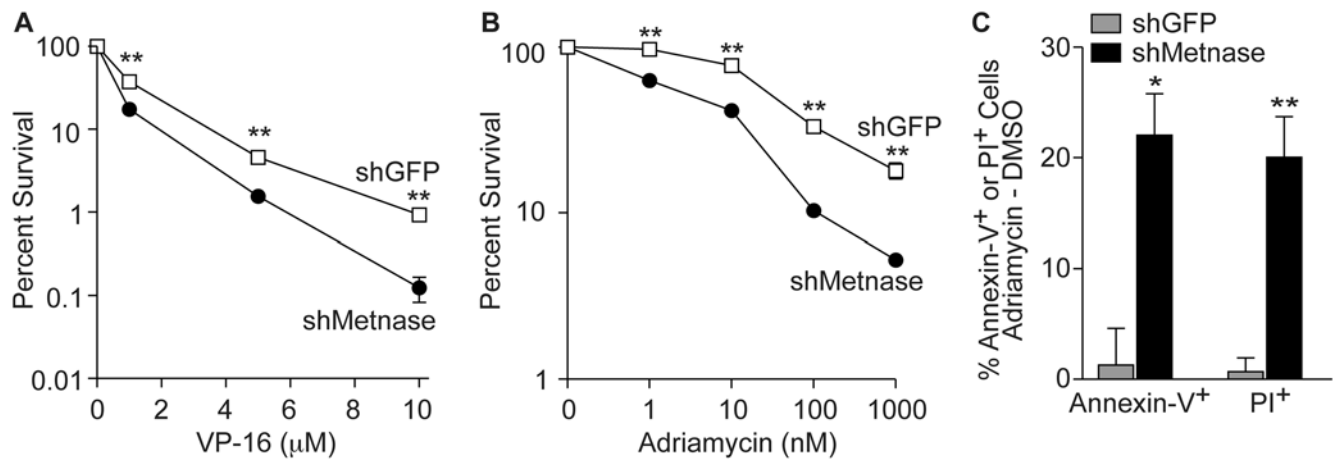

**Figure 3. Metnase levels predict breast cancer cell sensitivity to Topo II $\alpha$  inhibitors.** Cells stably transfected with vector control, or Metnase shRNA were treated with VP-16 (A) or adriamycin (B) and colony survival was measured as described. Values are averages  $\pm$  SEM for three determinations. (C) Cells transfected with control (shGFP) or Metnase shRNA were treated with 1  $\mu$ M adriamycin for 24 hrs and apoptosis (annexin-V) and cell death (propidium iodide) were analyzed by FACS. Values are averages (+SEM) for three determinations. doi:10.1371/journal.pone.0005323.g003

To determine the mechanism for the ability of Metnase to mediate sensitivity to Topo II $\alpha$  inhibitors, we investigated whether Metnase levels affected the cellular apoptotic response to adriamycin. We exposed MDA-MB-231 cells to adriamycin for 24 hrs and then evaluated annexin-V/FITC fluorescence by flow cytometry. We found that shRNA down-regulation of Metnase levels markedly sensitized these breast cancer cells to adriamycin-induced apoptosis (Fig. 3C). Compared to vector controls, cells with reduced Metnase levels showed a 17-fold higher frequency of apoptosis after adriamycin exposure. This finding suggests that Metnase suppresses adriamycin-induced apoptosis, contributing to the increased resistance of breast cancer cells to this drug.

To define the underlying mechanism of Metnase-dependent adriamycin resistance, we examined the effect of Metnase on adriamycin inhibition of Topo II $\alpha$ -mediated decatenation using a kinetoplast DNA (kDNA) *in vitro* decatenation assay (Fig. 4). Topo

II $\alpha$  decatenates kDNA (lanes 2–4) and adriamycin completely inhibits this activity (lane 5). As shown previously [19], purified Metnase does not decatenate kDNA on its own (lane 6), but enhances Topo II $\alpha$ -dependent kDNA decatenation by 4-fold (lane 8). Importantly, when Metnase is present, it overcomes the inhibition of Topo II $\alpha$  by adriamycin, and this is true whether Metnase is added to the reaction before or after adriamycin (lanes 9–10). Note also that in the presence of Metnase, there is a greater level of decatenation in the presence of adriamycin than with Topo II $\alpha$  alone in the absence of adriamycin (compare lanes 9 and 10 with lane 4).

Metnase is a known component of the DSB repair pathway, and may enhance resistance to Topo II $\alpha$  inhibitors by two mechanisms, enhancing DSB repair [15,16] or enhancing Topo II $\alpha$  function [19]. The data presented here suggest that the ability of Metnase to interact with Topo II $\alpha$ , and enhance Topo II $\alpha$ -

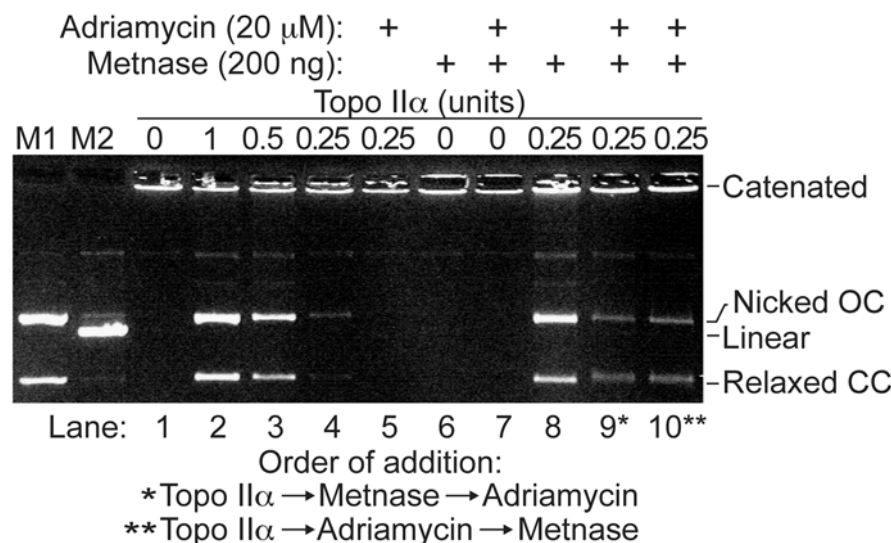

**Figure 4. Metnase blocks the inhibitory effect of adriamycin on Topo II $\alpha$  decatenation of kDNA.** kDNA was incubated with varying amounts of Topo II $\alpha$  (lanes 1–4), Topo II $\alpha$  and adriamycin (lane 5), Metnase alone (lane 6), Metnase and adriamycin (lane 7), or Topo II $\alpha$  and Metnase (lane 8). In lanes 9 and 10, kDNA was incubated with Topo II $\alpha$ , Metnase and adriamycin with different orders of addition as indicated below. doi:10.1371/journal.pone.0005323.g004

dependent decatenation *in vivo* and *in vitro* may be at least as important as its ability to promote DSB repair in surviving exposure to clinical Topo II $\alpha$  inhibitors. It is possible that Metnase could bind Topo II $\alpha$  and physically block binding by adriamycin. In this model, Metnase would be bound to Topo II $\alpha$  on DNA, and prevent adriamycin from stabilizing the Topo II $\alpha$ /DNA cleavage complex, allowing Topo II $\alpha$  to complete re-ligation. Alternatively, Metnase may function as a co-factor or chaperone to increase Topo II $\alpha$  reaction kinetics. Here Metnase would bind transiently to Topo II $\alpha$  and increase its reaction rate regardless of adriamycin binding. The mechanism may also be a functional combination of these two mechanisms where Metnase increases Topo II $\alpha$  kinetics while also blocking further binding of the drug.

Our interpretation of these data is that Metnase increases the intrinsic function of Topo II $\alpha$  via one of the above mentioned molecular mechanisms, and that this will result in fewer DSBs, not necessarily from enhanced DNA repair, but from Topo II $\alpha$  directly resisting adriamycin inhibition and thus inhibiting the production of DSBs. This model is supported by our findings that Metnase significantly blocks breast cancer cell metaphase arrest induced by ICRF-193, and that cellular resistance to Topo II $\alpha$  inhibitors is directly proportional to the Metnase expression level.

Our data reveal a novel mechanism for adriamycin resistance in breast cancer cells that may have important clinical implications. Metnase may be a critical biomarker for predicting tumor response to Topo II $\alpha$  inhibitors. By monitoring Metnase levels, treatments with Topo II $\alpha$  inhibitors may be tailored to improve efficacy. In addition, since reduced Metnase levels increase sensitivity to clinical Topo II $\alpha$  inhibitors, inhibiting Metnase with a small molecule could improve response in combination therapies. Metnase inhibition may be especially important in a recurrent breast tumor that was previously exposed to Topo II $\alpha$  inhibitors, since resistance to these agents may be due to upregulation of Metnase and/or Topo II $\alpha$ . In summary, Metnase mediates the ability of Topo II $\alpha$  to resist clinically relevant inhibitors, and may itself prove clinically useful in the treatment of breast cancer.

## Materials and Methods

### Cell culture, manipulating Metnase levels and co-immunoprecipitation

MDA-MB-231, T47, and HCC1937 breast cancer cell lines were cultured in Dulbecco's modified medium fully supplemented with 1% antimycotic/antibiotic (Cellgro, Mannasas, VA), and 10% Fetal Bovine Serum (Atlanta Biologicals, Lawrenceville, VA). The MCF10-A cell line was cultured in DMEM/F12 (Invitrogen, Carlsbad, CA) fully supplemented with 5% horse serum (Invitrogen, Carlsbad, CA), 20 ng/mL EGF (Invitrogen, Carlsbad, CA), 10 mg/L Insulin (Sigma, St. Louis, MO), 100 nM Hydrocortisone (Invitrogen, Carlsbad, CA), and 100 ng/mL Cholera toxin (Sigma, St. Louis, MO). MDA-MB-231 cells (ATCC) were stably transfected with pRS expressing shGFP control or shRNAs targeted to Metnase's nuclease domain in nucleotides 1198–

1226, 1270–1298, and 1800–1828 (Origene, Rockville, MD). Metnase levels were assessed using RT-PCR and Western blotting [15]. Co-immunoprecipitation of Metnase and Topo II $\alpha$  using anti-Topo II $\alpha$  (Topogen, Port Orange, FL) was performed in the presence of 1.0 U/mL DNase I.

### Analysis of metaphase decatenation arrest

ICRF-193 (MP Biomedicals, Solon, OH) reversibly inhibits Topo II $\alpha$  without inducing DNA DSBs, thereby allowing assessment of the decatenation checkpoints without activating the DNA damage checkpoints [7,23]. ICRF-193 was dissolved in DMSO and further diluted in growth medium. Unsynchronized cells were treated with 2 or 10  $\mu$ M ICRF-193, or an equivalent volume of DMSO (vehicle control) for 4 or 18 hours as labeled, harvested, cytopun, fixed with ice cold methanol, and stained with anti-tubulin antibody conjugated to FITC (Abcam, Cambridge, MA) for 2 hrs at room temperature and 4'-6-diamidino-2-phenylindole (DAPI, Vectashield). Interphase and metaphase cells were counted by immunofluorescence microscopy (Nikon TE2000 inverted microscope equipped with filter sets specific to FITC and DAPI). The fractional increase in ICRF-193 metaphase-arrested cells over vehicle controls was due to failure to traverse the metaphase decatenation checkpoint [3,5,8–10]. Data were collected from  $\geq$ 1500 cells in duplicate experiments.

### Cytotoxicity of topoisomerase II inhibitors and analysis of apoptosis

Cells expressing various levels of Metnase were treated with VP-16 for 8 hr or adriamycin for 4 hr in growth medium, washed twice, fresh growth medium replaced, and incubated at 37°C with 5% CO<sub>2</sub> for 10–14 days. Plating efficiencies were calculated by plating untreated cells in a similar manner. Colonies were stained with 1% methylene blue (Sigma, St. Louis, MO) and counted and percent survival was calculated after normalization to plating efficiency of untreated control cells. Apoptosis was analyzed by measuring annexin-V expression in cells treated with 1.0  $\mu$ M adriamycin for 24 hr using the Annexin V-FITC Apoptosis Detection Kit I (BD Pharmingen, NJ).

### Kinetoplast DNA decatenation

Purified recombinant Topo II $\alpha$  (GE Healthcare, Piscataway, NJ) and catenated kinetoplast DNA (kDNA, Topogen, Port Orange, FL) were used according to the manufacturers' instructions. Recombinant Metnase was purified as described [24]. Adriamycin was added to specific reactions at a final concentration of 20  $\mu$ M and kDNA decatenation was visualized by agarose gel electrophoresis.

### Author Contributions

Conceived and designed the experiments: RH. Performed the experiments: JW EW. Analyzed the data: EW MR MS JAN. Contributed reagents/materials/analysis tools: BDB SHL. Wrote the paper: JW JAN RH.

## References

- Garces CA, Cance WG (2004) Neoadjuvant chemotherapy of breast cancer. *The American Surgeon* 70: 565–569.
- Baldwin EL, Osheroff N (2005) Etoposide, topoisomerase II and cancer. *Curr Med Chem Anticancer Agents* 5: 363–372.
- Damelin M, Bestor TH (2007) The decatenation checkpoint. *British Journal of Cancer* 96: 201–205.
- Clarke DJ, Gimenez-Abian JF (2000) Checkpoints controlling mitosis. *Bioessays* 22: 351–363.
- Clarke DJ, Vas AG, Andrews CA, Diaz-Martinez LA, Gimenez-Abian JF (2006) Topoisomerase II checkpoints: universal mechanisms that regulate mitosis. *Cell Cycle* 5: 1925–1928.
- Wang JC (2002) Cellular roles of DNA topoisomerases: a molecular perspective. *Nature Reviews* 3: 430–440.
- Downes CS, Clarke DJ, Mullinger AM, Gimenez-Abian JF, Creighton AM, Johnson RT (1994) A topoisomerase II-dependent G2 cycle checkpoint in mammalian cells. *Nature* 372: 467–470.
- Mikhailov A, Shinohara M, Rieder CL (2004) Topoisomerase II and histone deacetylase inhibitors delay the G2/M transition by triggering the p38 MAPK checkpoint pathway. *J Cell Biol* 166: 517–526.
- Skoufias DA, Lacroix FB, Andreassen PR, Wilson L, Margolis RL (2004) Inhibition of DNA decatenation, but not DNA damage, arrests cells at metaphase. *Molecular Cell* 15: 977–990.

10. Toyoda Y, Yanagida M (2006) Coordinated requirements of human topo II and cohesin for metaphase centromere alignment under Mad2-dependent spindle checkpoint surveillance. *Molecular Biology of the Cell* 17: 2287–2302.
11. Deming PB, Cistulli CA, Zhao H, Graves PR, Piwnica-Worms H, et al. (2001) The human decatenation checkpoint. *Proc Natl Acad Sci U S A* 98: 12044–12049.
12. Deming PB, Flores KG, Downes CS, Paules RS, Kaufmann WK (2002) ATR enforces the topoisomerase II-dependent G2 checkpoint through inhibition of Plk1 kinase. *J Biol Chem* 277: 36832–36838.
13. Nakagawa T, Hayashita Y, Maeno K, Masuda A, Sugito N, et al. (2004) Identification of decatenation G2 checkpoint impairment independently of DNA damage G2 checkpoint in human lung cancer cell lines. *Cancer Res* 64: 4826–4832.
14. Doherty SC, McKeown SR, McKelvey-Martin V, Downes CS, Atala A, et al. (2003) Cell cycle checkpoint function in bladder cancer. *Journal of the National Cancer Institute* 95: 1859–1868.
15. Lee SH, Oshige M, Durant ST, Rasila KK, Williamson EA, et al. (2005) The SET domain protein Metnase mediates foreign DNA integration and links integration to nonhomologous end-joining repair. *Proc Natl Acad Sci U S A* 102: 18075–18080.
16. Hromas R, Wray J, Lee SH, Martinez L, Farrington J, et al. (2008) The human set and transposase domain protein Metnase interacts with DNA Ligase IV and enhances the efficiency and accuracy of non-homologous end-joining. *DNA Repair (Amst)* 7: 1927–1937.
17. Beck BD, Park SJ, Lee YJ, Roman Y, Hromas RA, et al. (2008) Human Pso4 is a Metnase (SETMAR)-binding partner that regulates Metnase function in DNA repair. *J Biol Chem* 283: 9023–9030.
18. Williamson EA, Farrington J, Martinez L, Ness S, O'Rourke J, et al. (2008) Expression levels of the human DNA repair protein metnase influence lentiviral genomic integration. *Biochimie* 90: 1422–1426.
19. Williamson EA, Rasila KK, Corwin LK, Wray J, Beck BD, et al. (2008) The SET and transposase domain protein Metnase enhances chromosome decatenation: regulation by automethylation. *Nucleic Acids Res* 36: 5822–5831.
20. Richardson DS, Johnson SA (1997) Anthracyclines in haematology: preclinical studies, toxicity and delivery systems. *Blood reviews* 11: 201–223.
21. Binaschi M, Bigioni M, Cipollone A, Rossi C, Goso C, et al. (2001) Anthracyclines: selected new developments. *Curr Med Chem Anticancer Agents* 1: 113–130.
22. Felix CA (2001) Leukemias related to treatment with DNA topoisomerase II inhibitors. *Medical and Pediatric Oncology* 36: 525–535.
23. Ishida R, Miki T, Narita T, Yui R, Sato M, et al. (1991) Inhibition of intracellular topoisomerase II by antitumor bis(2,6-dioxopiperazine) derivatives: mode of cell growth inhibition distinct from that of cleavable complex-forming type inhibitors. *Cancer Res* 51: 4909–4916.
24. Roman Y, Oshige M, Lee Y-J, Goodwin K, Georgiadis MM, et al. (2007) Biochemical characterization of a SET and transposase fusion protein, Metnase (SETMAR) for its DNA binding and DNA cleavage activity. *Biochemistry* 46: 11369–11376.
